# Supplementary material
Source: PubMed Central journal article supplement (PMC7068533)

# Supplemental Figure 3

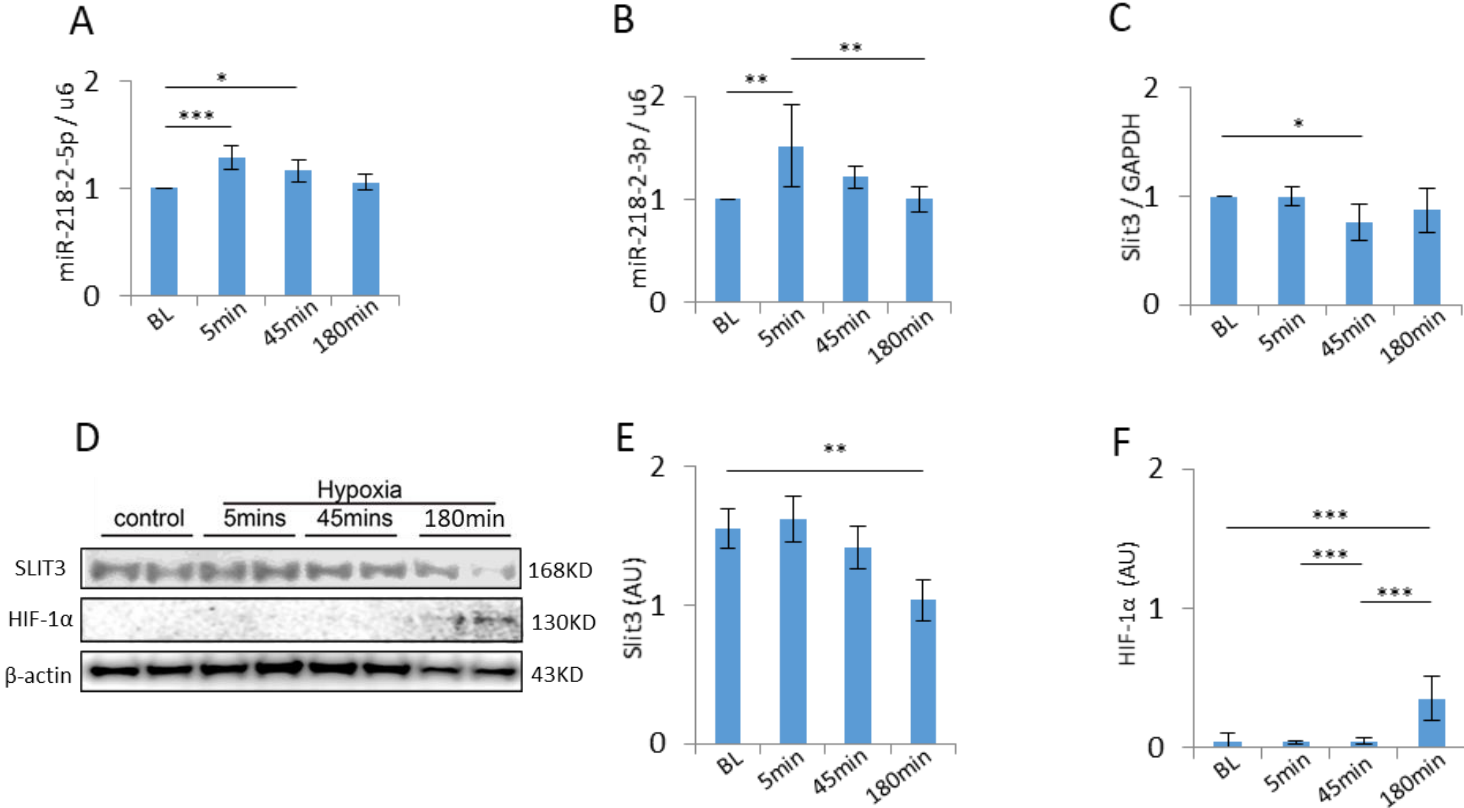

Supplement: mmc3.pdf [file mmc3.pdf]

# Supplemental Figure 4

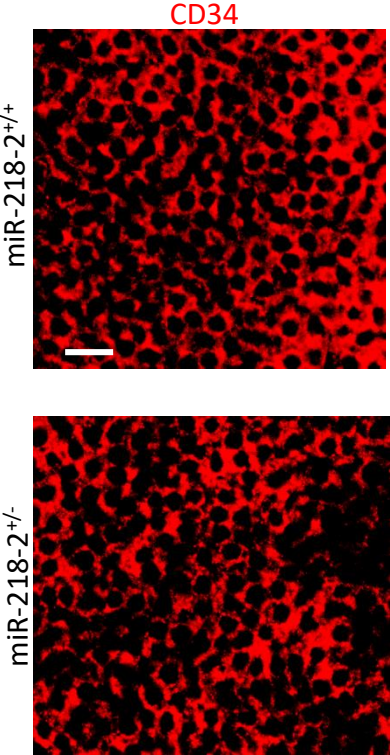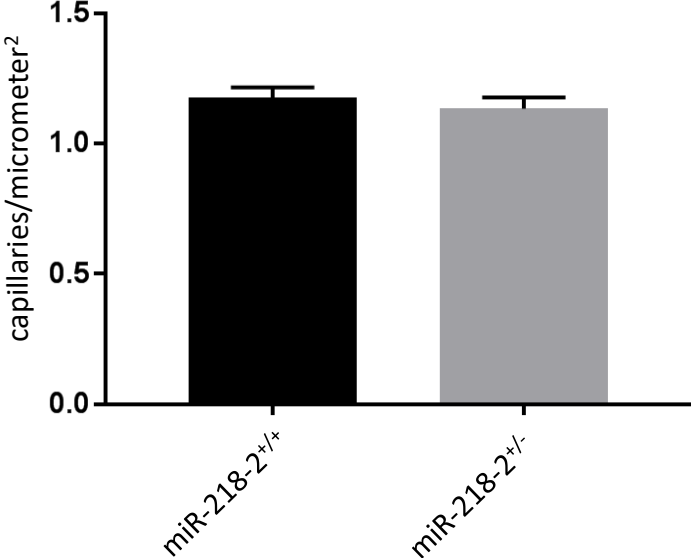

Supplement: mmc4.pdf [file mmc4.pdf]
